# Supplementary material
Source: PubMed Central journal article supplement (PMC6479249)
Supplement: Supp_Fig1.pdf [file Supp_Fig1.pdf]

## Supplementary Data

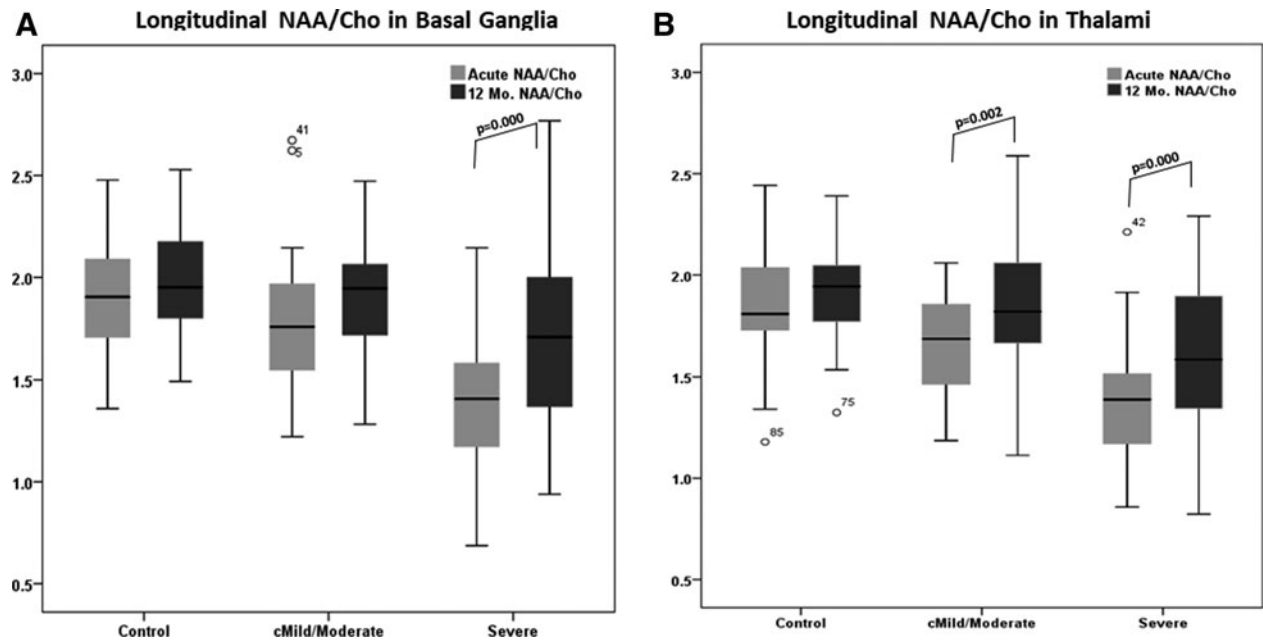

**SUPPLEMENTARY FIG. S1.** Box plots displaying mean NAA/Cho ratios, 95% confidence intervals (whiskers), and outliers (°) from the (A) basal ganglia and (B) thalami for control subjects measured at enrollment and at 1 year and for TBI groups measured acutely (6–17 days) and 12 months after injury. Cho, choline; NAA, N-acetylaspartate; TBI, traumatic brain injury.
